# Supplementary material
Source: Royal Society of Chemistry journal article supplement (doi:10.1039/d5nr05505a)
Supplement: d5nr05505a1.pdf [file d5nr05505a1.pdf]

Supplementary Information for:

One-pot microwave synthesis of core-shell C@Bi<sub>2</sub>S<sub>3</sub> nanoflake-like structure for humidity-dependent photodetection applications

Marcin Godzierz<sup>1,\*</sup>, Sonia Gorawska<sup>1,2</sup>, Krystian Mistewicz<sup>3</sup>, Łukasz Otulakowski<sup>1</sup>, Karolina Olszowska<sup>1</sup>, Viktoriia Talaniuk<sup>1</sup>, Anna Gawron<sup>1</sup>, Mirosława Pawlyta<sup>4</sup>, Urszula Szeluga<sup>1</sup>

1 – Centre of Polymer and Carbon Materials, Polish Academy of Sciences, Curie-Skłodowskiej 34 Str., 41-819 Zabrze, Poland

2 - Silesian University of Technology, Joint Doctoral School, Akademicka 2A, 44-100 Gliwice, Poland

3 – Silesian University of Technology, Institute of Physics – Centre for Science and Education, Krasińskiego 8, 40-019 Katowice, Poland

4 – Silesian University of Technology, Materials Research Laboratory, Faculty of Mechanical Engineering, Konarskiego 18 A, 44-100 Gliwice, Poland

Corresponding author: [mgodzierz@cmpw-pan.pl](mailto:mgodzierz@cmpw-pan.pl)

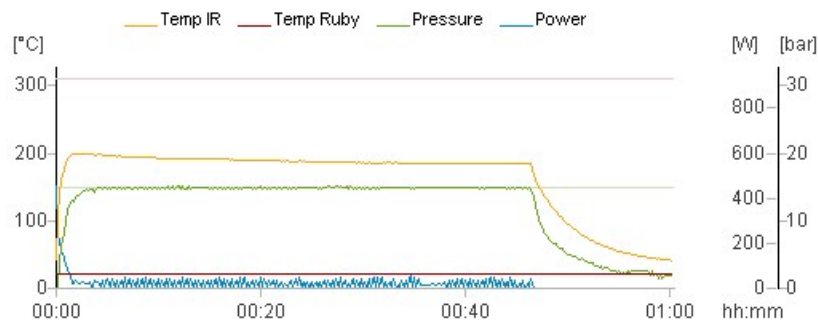

Fig. S1. Changes of pressure and temperature over synthesis of core-shell C@Bi<sub>2</sub>S<sub>3</sub> nanoflakes.

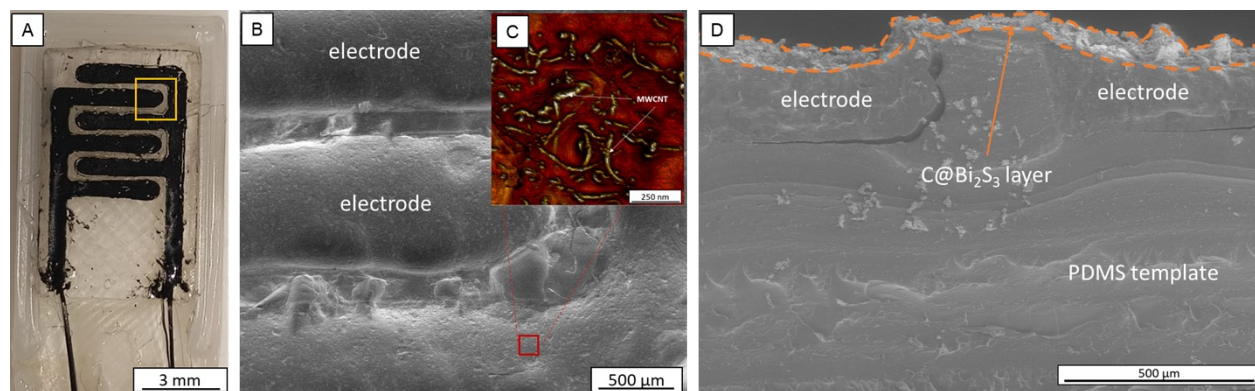

Fig. S2. The digital photograph (A) of fabricated sensor platform, SEM microphotograph (B) from square marked in digital photo, AFM image (C) from red square marked in SEM microphotograph and SEM microphotograph (D) of photodetectors' cross-section, with visible C@Bi<sub>2</sub>S<sub>3</sub> layer on the top.

Table S1. Values of bandgap energy reported in the literature for bismuth sulfide.

| Material                                    | Method of material preparation | Energy band gap value, eV | Band gap type | Ref. |
|---------------------------------------------|--------------------------------|---------------------------|---------------|------|
| Bi <sub>2</sub> S <sub>3</sub> film         | atomic layer deposition        | 1.03                      | indirect      | 1    |
| Bi <sub>2</sub> S <sub>3</sub>              | not applicable                 | 1.32                      | indirect      | 2    |
| Bi <sub>2</sub> S <sub>3</sub> film         | physical vapor deposition      | 1.32 – 1.36               |               | 3    |
| Bi <sub>2</sub> S <sub>3</sub> film         | reactive evaporation           | 1.38                      | direct        | 4    |
| Bi <sub>2</sub> S <sub>3</sub> nanoflowers  | hydrothermal method            | 1.39                      | direct        | 5    |
| Bi <sub>2</sub> S <sub>3</sub> film         | electrochemical synthesis      | 1.4                       | direct        | 6    |
| Bi <sub>2</sub> S <sub>3</sub> nanosheets   | hydrothermal vulcanization     | 1.41                      | direct        | 7    |
| Bi <sub>2</sub> S <sub>3</sub> nanocrystals | organometallic synthesis       | 1.443                     |               | 8    |

|                                                     |                                                |         |          |           |
|-----------------------------------------------------|------------------------------------------------|---------|----------|-----------|
| Bi <sub>2</sub> S <sub>3</sub> nanowires            | hydrothermal vulcanization                     | 1.46    | direct   | 7         |
| Bi <sub>2</sub> S <sub>3</sub> nanoribbons          | hydrothermal vulcanization                     | 1.47    | direct   | 7         |
| Bi <sub>2</sub> S <sub>3</sub>                      | not applicable                                 | 1.492   | indirect | 9         |
| Bi <sub>2</sub> S <sub>3</sub> film                 | atomic layer deposition                        | 1.56    | direct   | 1         |
| Bi <sub>2</sub> S <sub>3</sub> film                 | chemical bath deposition                       | 1.56    | direct   | 10        |
| Bi <sub>2</sub> S <sub>3</sub> film                 | successive ionic layer adsorption and reaction | 1.61    | direct   | 11        |
| Bi <sub>2</sub> S <sub>3</sub> film                 | pulse-plating method                           | 1.68    | direct   | 12        |
| Bi <sub>2</sub> S <sub>3</sub>                      | microwave synthesis                            | 1.34(2) | direct   | 13        |
| Bi <sub>2</sub> S <sub>3</sub> -PVA <sub>high</sub> | PVA-assisted microwave synthesis               | 1.41(1) | direct   |           |
| Bi <sub>2</sub> S <sub>3</sub> -PVA <sub>low</sub>  | PVA-assisted microwave synthesis               | 1.43(3) | direct   |           |
| μ-Bi <sub>2</sub> S <sub>3</sub>                    | PVP-assisted microwave synthesis               | 1.36(2) | direct   | 14        |
| sμ-Bi <sub>2</sub> S <sub>3</sub>                   | PVP-assisted microwave synthesis               | 1.41(1) | direct   |           |
| C@Bi <sub>2</sub> S <sub>3</sub> nanoflakes         | PEG-assisted microwave synthesis               | 1.33(3) | direct   | this work |

Table S2. Values of  $n$  exponents of dependence  $I \sim U^n$  determined for the ohmic regime ( $U < U_{tr}$ ) and space charge limited current regime ( $U > U_{tr}$ ) under different illumination conditions, where  $U_{tr}$  denotes a transition voltage.

|                                                                                          | <i>RH</i> , % | <i>n</i> exponent |
|------------------------------------------------------------------------------------------|---------------|-------------------|
| Dark condition<br>( $I_L = 0$ )                                                          | 75            | 1.461             |
|                                                                                          | 55            | 1.379             |
|                                                                                          | 40            | 1.385             |
| Red light illumination<br>( $\lambda = 629$ nm, $I_L = 53.4$ $\mu$ W/cm <sup>2</sup> )   | 75            | 1.460             |
|                                                                                          | 55            | 1.403             |
|                                                                                          | 40            | 1.409             |
| Blue light illumination<br>( $\lambda = 465$ nm, $I_L = 69.0$ $\mu$ W/cm <sup>2</sup> )  | 75            | 1.381             |
|                                                                                          | 55            | 1.389             |
|                                                                                          | 40            | 1.369             |
| Green light illumination<br>( $\lambda = 522$ nm, $I_L = 78.9$ $\mu$ W/cm <sup>2</sup> ) | 75            | 1.379             |
|                                                                                          | 55            | 1.381             |
|                                                                                          | 40            | 1.396             |
| White light illumination<br>( $I_L = 178.1$ $\mu$ W/cm <sup>2</sup> )                    | 75            | 1.364             |
|                                                                                          | 55            | 1.369             |
|                                                                                          | 40            | 1.382             |

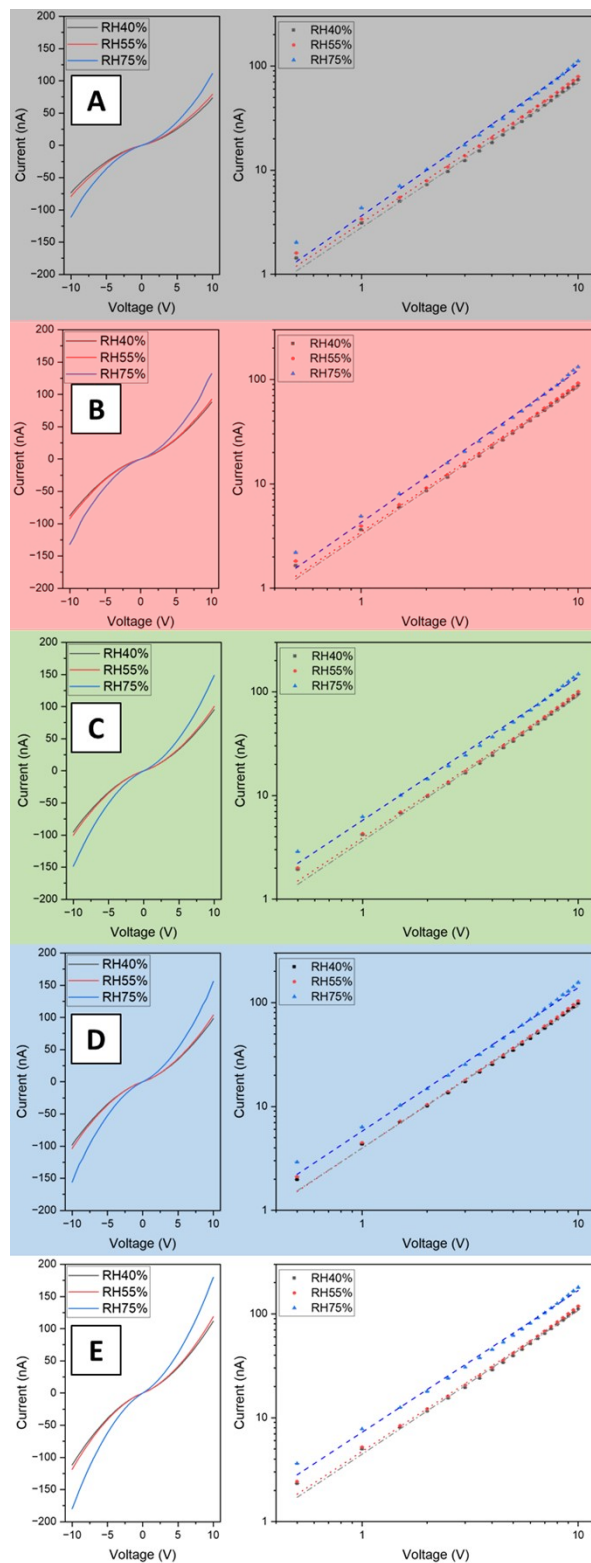

Fig. S3. Humidity-dependent current-voltage characteristics in dark (A), and under red (B,  $\lambda = 629$  nm), green (C,  $\lambda = 522$  nm), blue (D,  $\lambda = 465$  nm) and white light (E) illumination. Right graphs show log-log plot, with two fitted curves up to 3V and above 3V (see Table S1).

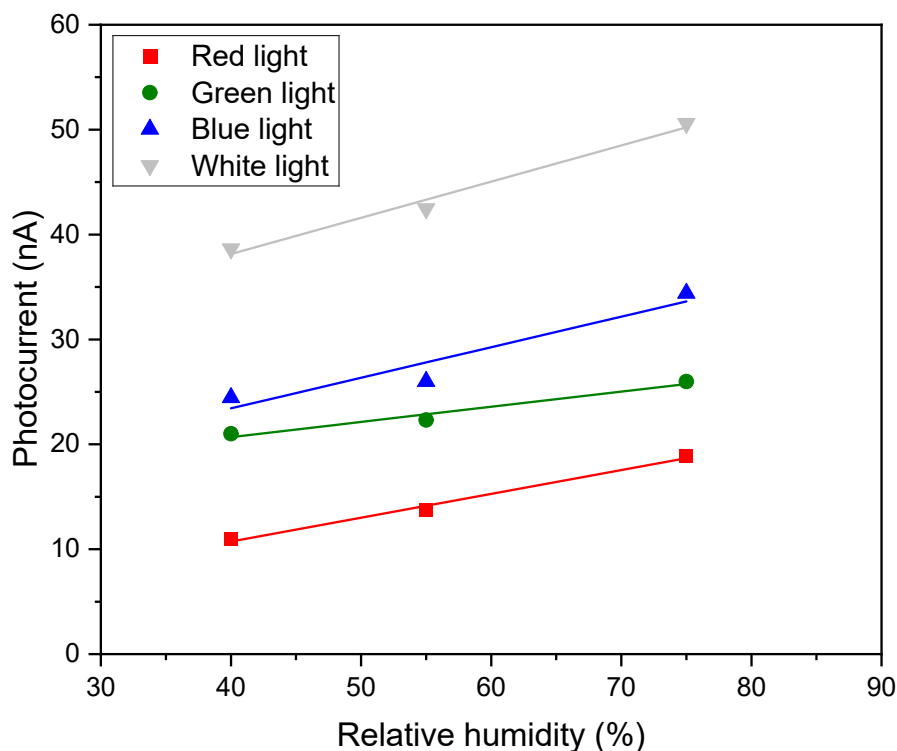

Fig. S4. The relationship between relative humidity and photocurrent induced by red light ( $\lambda = 629$  nm,  $I_L = 53.4 \mu\text{W}/\text{cm}^2$ ), green light ( $\lambda = 522$  nm,  $I_L = 78.9 \mu\text{W}/\text{cm}^2$ ), blue light ( $\lambda = 465$  nm,  $I_L = 69.0 \mu\text{W}/\text{cm}^2$ ), and white light ( $I_L = 178.1 \mu\text{W}/\text{cm}^2$ ).

Table S3. The values of the power exponent determined by best fitting the theoretical dependence of light intensity on photocurrent (Equation (3)) to experimental data presented in Figures 8A-C.

| Light color                        | The power exponent $\gamma$ |             |             |
|------------------------------------|-----------------------------|-------------|-------------|
|                                    | $RH = 40\%$                 | $RH = 55\%$ | $RH = 75\%$ |
| <b>Red</b> ( $\lambda = 629$ nm)   | 0.575(7)                    | 0.562(3)    | 0.484(2)    |
| <b>Green</b> ( $\lambda = 522$ nm) | 0.661(1)                    | 0.568(4)    | 0.547(4)    |
| <b>Blue</b> ( $\lambda = 465$ nm)  | 0.689(3)                    | 0.666(6)    | 0.649(5)    |
| <b>White</b>                       | 0.669(2)                    | 0.648(5)    | 0.611(6)    |

#### References

- 1 N. Mahuli, D. Saha and S. K. Sarkar, *J. Phys. Chem. C*, 2017, **121**, 8136–8144.
- 2 H. Koc, H. Ozisik, E. Deligöz, A. M. Mamedov and E. Ozbay, *J. Mol. Model.*, 2014, **20**, 2180.
- 3 S. ten Haaf, H. Sträter, R. Brüggemann, G. H. Bauer, C. Felser and G. Jakob, *Thin Solid Films*, 2013, **535**, 394–397.
- 4 J. Lukose and B. Pradeep, *Solid State Commun.*, 1991, **78**, 535–538.

- 5 S. Sharma and N. Khare, *Colloid Polym. Sci.*, 2018, **296**, 1479–1489.
- 6 Z. Grubač, J. Katić and M. Metikoš-Huković, *J. Electrochem. Soc.*, 2019, **166**, H433.
- 7 Y.-C. Liang and T.-H. Li, 2022, **11**, 284–297.
- 8 M. Aresti, M. Saba, R. Piras, D. Marongiu, G. Mula, F. Quochi, A. Mura, C. Cannas, M. Mureddu, A. Ardu, G. Ennas, V. Calzia, A. Mattoni, A. Musinu and G. Bongiovanni, *Adv. Funct. Mater.*, 2014, **24**, 3341–3350.
- 9 H. Ben Abdallah and W. Ouerghui, *Opt. Quantum Electron.*, 2021, **54**, 20.
- 10 H. Moreno-García, S. Messina, M. Calixto-Rodríguez and H. Martínez, *Appl. Surf. Sci.*, 2014, **311**, 729–733.
- 11 M. Suresh Kumar, S. P. Madhusudanan, K. Mohanta and S. K. Batabyal, *Mater. Res. Express*, 2020, **7**, 15909.
- 12 F. Ding, Q. Wang, S. Zhou, G. Zhao, Y. Ye and R. Ghomashchi, *R. Soc. Open Sci.*, 2020, **7**, 200479.
- 13 K. Mistewicz, M. Godzierz, A. Gawron, Ł. Otulakowski, A. Hercog, K. Kurtyka, S. Hajra and H. J. Kim, *J. Mater. Chem. C*, 2024, **12**, 15691–15703.
- 14 M. Godzierz, K. Mistewicz, A. Gawron, K. Kurtyka, Ł. Otulakowski and T. Kanti Das, *J. Alloys Compd.*, , DOI:10.1016/j.jallcom.2024.176820.
